# Supplementary material
Source: PubMed Central journal article supplement (PMC7863876)

## Supporting Information

### Genetic evidence for partial redundancy between the arginine methyltransferases CARM1 and PRMT6

Donghang Cheng<sup>1#</sup>, Guozhen Gao<sup>2#</sup>, Alessandra Di Lorenzo<sup>2</sup>, Sandrine Jayne<sup>3,4</sup>, Michael O. Hottiger<sup>4</sup>,  
Stephane Richard<sup>5</sup>, Mark T. Bedford<sup>2\*</sup>

<sup>1</sup>Departments of Pediatrics,  
University of Texas, MD Anderson Cancer Center, Houston, TX 77030, USA.

<sup>2</sup>Department of Epigenetics and Molecular Carcinogenesis,  
The University of Texas MD Anderson Cancer Center, Smithville, TX 78957, USA

<sup>3</sup>The Ernest and Helen Scott Haematological Research Institute,  
Leicester Cancer Research Center, University of Leicester, Leicester, LE1 9HN, UK

<sup>4</sup>Department of Molecular Mechanisms of Disease,  
University of Zurich, 8057 Zurich, Switzerland

<sup>5</sup>Segal Cancer Center, Lady Davis Institute for Medical Research,  
Sir Mortimer B. Davis Jewish General Hospital,  
and Departments of Medicine and Oncology,  
McGill University, Montréal, Québec, Canada

# These authors contributed equally to this work

\* Corresponding author: Mark T. Bedford

Email: [mtbedford@mdanderson.org](mailto:mtbedford@mdanderson.org)

**Figure S1. Validation of CARM1 MEFs and histone H3 arginine methyl-specific antibodies. (A)** Total lysates from CARM1 WT, KO, and KI (enzyme-dead) MEF cells were probed with anti-CARM1 antibody. *In vitro* methylation was performed using the indicated cell lysates as the enzyme source with GST-PABP1 in the presence of [<sup>3</sup>H] SAM (bottom panel). **(B)** 5 mg of histone H3 peptides that contain a specific methylated arginine site were separated by SDS-PAGE and immunoblotted using indicated histone H3 arginine methyl-specific antibodies. **(C)** Purified wild-type and arginine mutant GST-H3 tail were incubated with PRMT6 that was purified from Baculovirus-infected Sf9 in an *in vitro* methylation assay. Methylation status was analyzed by immunoblot using anti-H3R17me2a antibody.

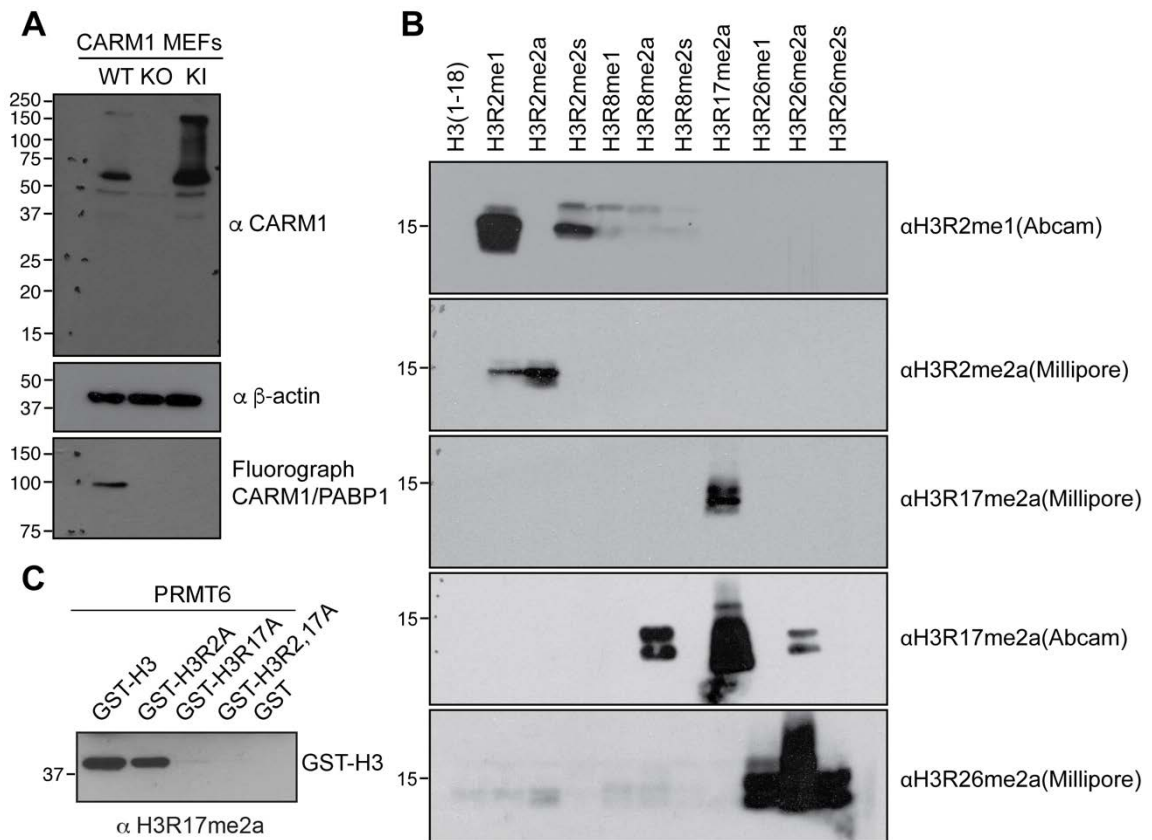

**Figure S2. Histone H3R17me2a signal is generated by the nuclear expression of CARM1 and PRMT6. (A)** HeLa cells were transfected with GFP-CARM1 and GFP-PRMT6 plasmids. Then the cells were stained with DAPI, and the GFP and DAPI signals were taken under a microscope. **(B)** HeLa cells were transfected with GFP-NLS vector and GFP-NLS-CARM1. Then the cells were stained with DAPI, and the GFP and DAPI signals were taken under a microscope. **(C)** HEK293T cells were transfected with GFP-NLS or GFP-NLS-CARM1. Then the cells were separated into 3 fractions: cytoplasm, nucleus and core histones. The levels of CARM1 and H3R17me2a were detected by Western blot. **(D)** HEK293T cells were transfected with ER\*-flag-PRMT6 and then treated with 4-hydroxytamoxifen for 48 hrs. Then the cells were fractionated and the levels of PRMT6 and H3R17me2a were detected by Western blot.

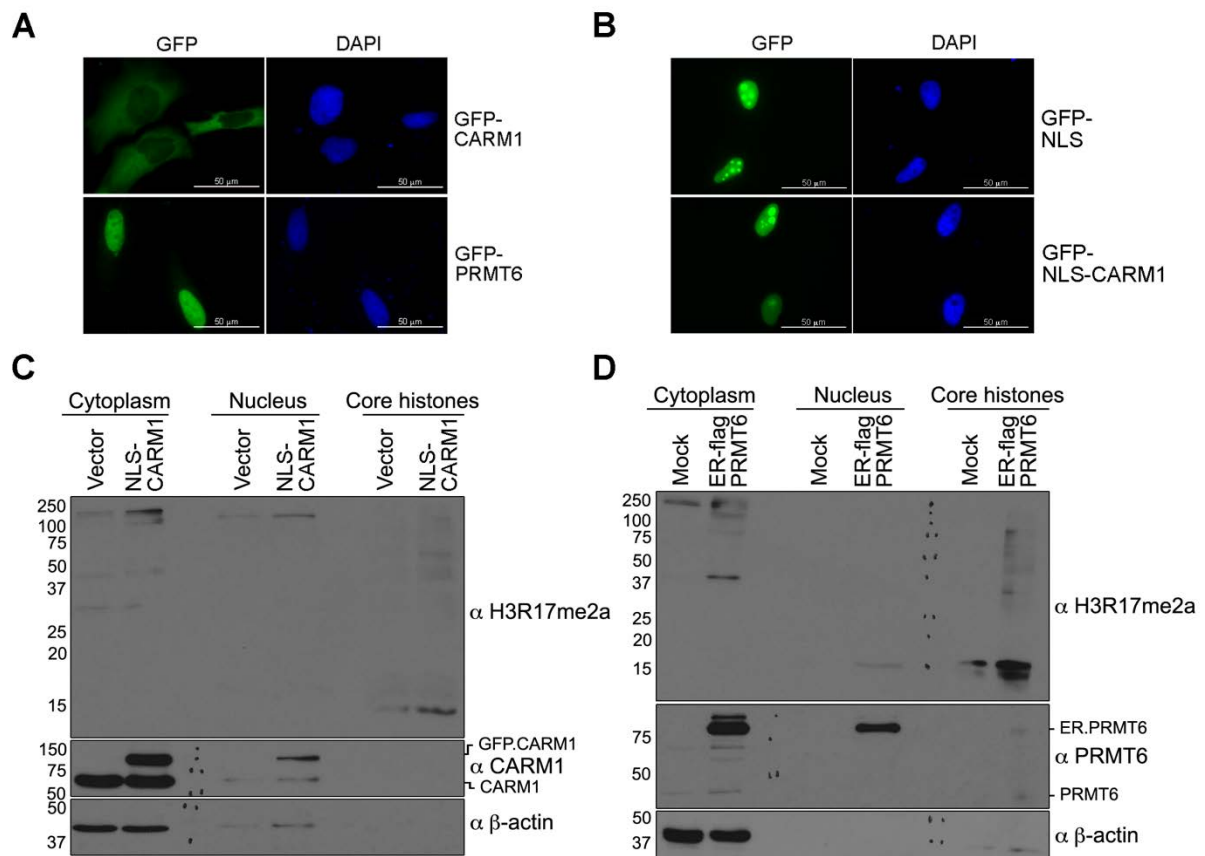

**Figure S3. Genotype confirmation of the CARM1 and PRMT6 knockout embryos by PCR and Western blot. (A)** Images of a representative litter of embryos from cross-breeding CARM1<sup>+/-</sup> PRMT6<sup>-/-</sup> mice. **(B)** Genomic DNA from the 10 embryos in (A) was extracted and applied to PCR for genotyping using primers described in “*Experimental Procedures*”. DNA fragments derived from the wild-type (WT) and knockout (KO) alleles are indicated on the right. **(C)** Embryonic and primary cell lysates were separated by SDS-PAGE and subsequently immunoblotted with CARM1 and PRMT6 antibodies. “Controls” were genomic DNA from the original established PRMT6 KO and CARM1 Het mice.

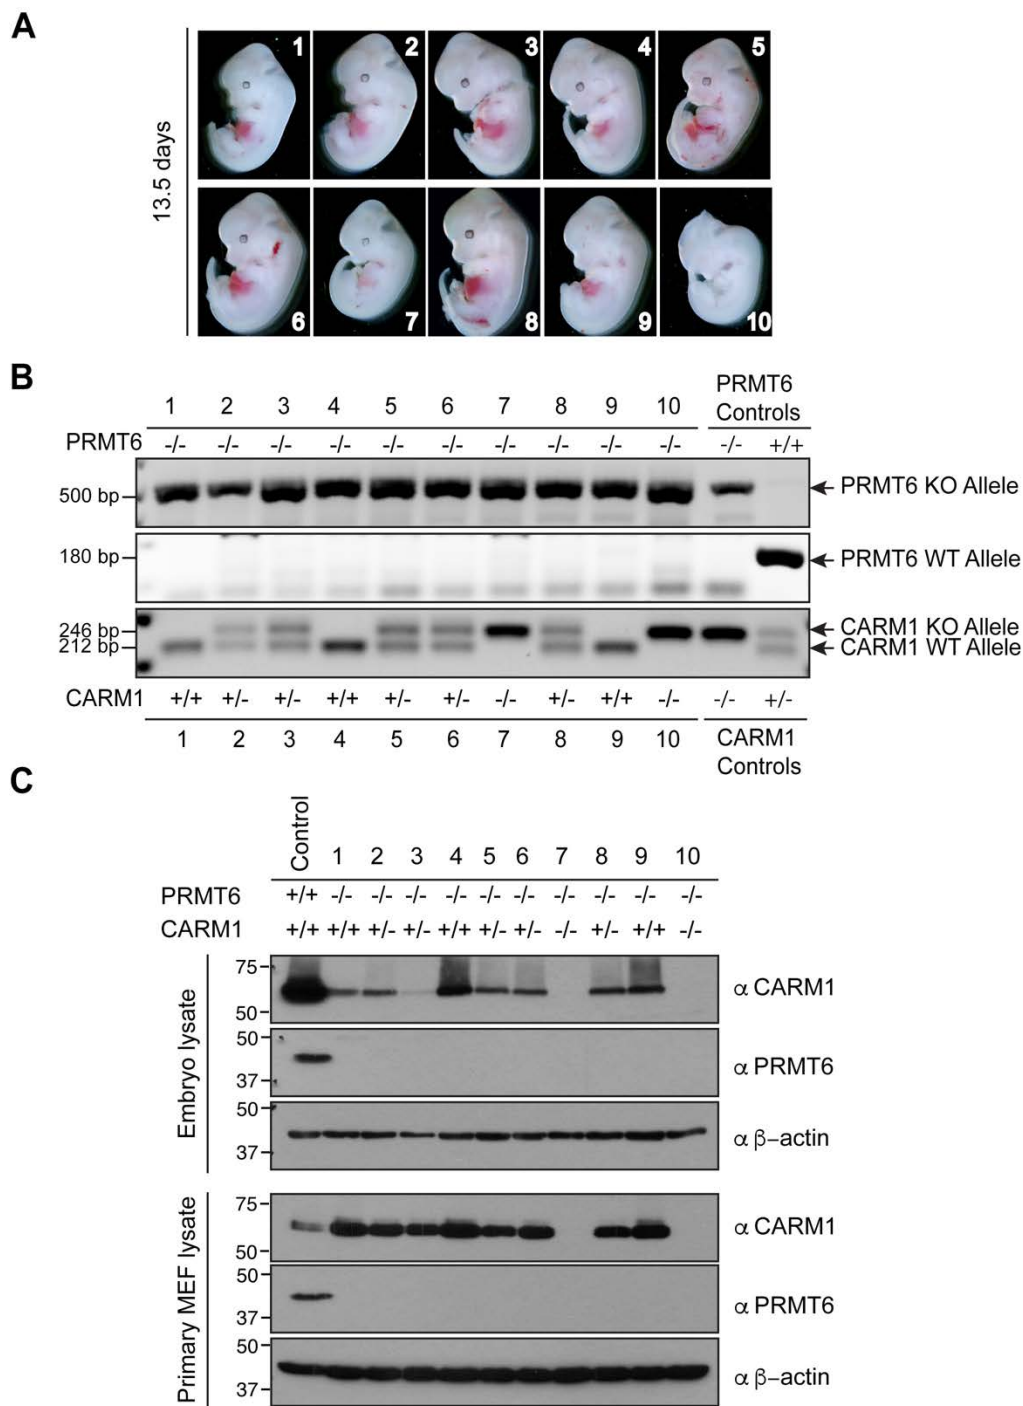

**Figure S4. Cell growth curve with the treatment of CARM1 and/or PRMT6 inhibitors.** Wild-type MEFs were treated with 3  $\mu$ M CARM1 inhibitor alone, 3  $\mu$ M PRMT6 inhibitor alone or the inhibitors together, for a total of 6 days. Cells were counted using CellTiterGlo® kit and the luminescence was recorded every 2 days.

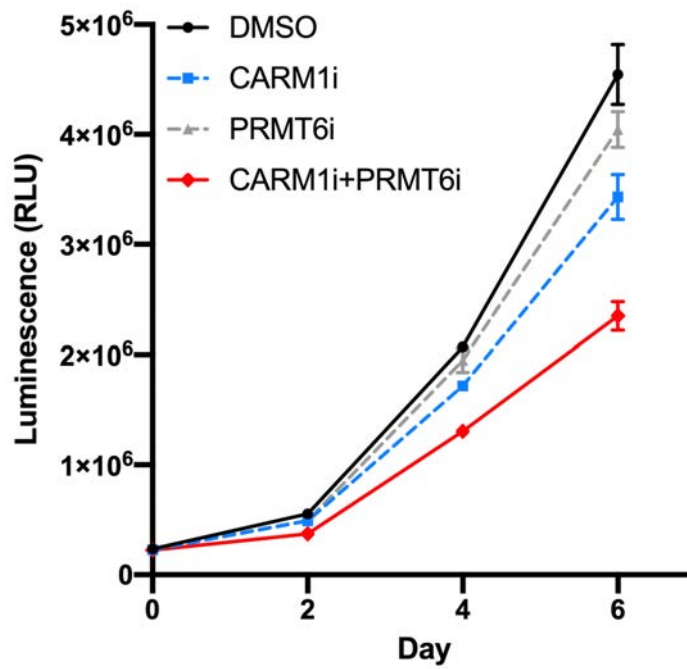

**Figure S5. The specificity of pan CARM1 substrate antibody.** HEK293T cells were treated with inhibitors to type I PRMT (MS023), CARM1 (TP-064) or PRMT6 (EPZ020411) with increasing concentrations, for a total of 4 days. The levels of CARM1 substrates were monitored by Western blot using the pan CARM1 substrate antibody ( $\alpha$ CARM1<sup>sub</sup>).

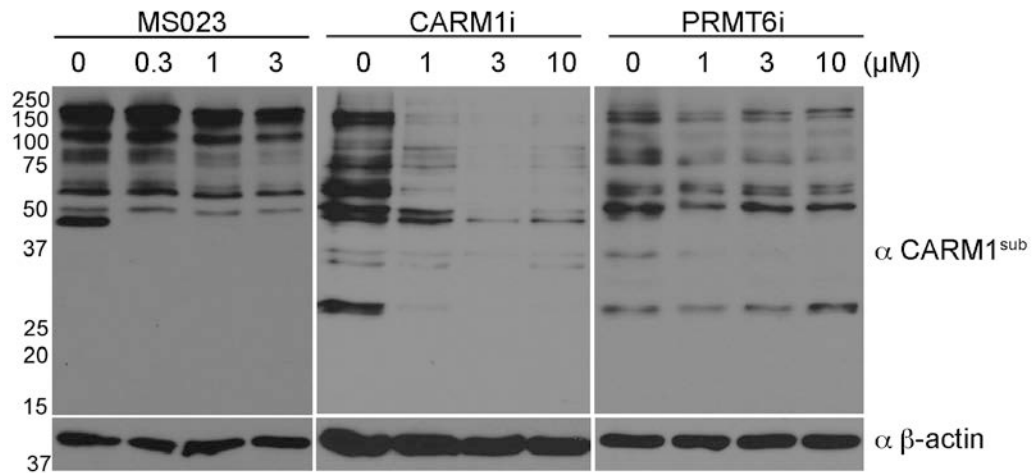

Supplement: supp_RA120.014704_161334_2_supp_606449_qhl7zy.pdf [file supp_RA120.014704_161334_2_supp_606449_qhl7zy.pdf]
